# Supplementary material for: A Systematic Approach to Thermochemical Treatment of Municipal Household Solid Waste into Valuable Products: Analysis of Routes, Gravimetric Analysis, Pre-Treatment of Solid Mixtures, Thermochemical Processes, and Characterization of Bio-Oils and Bio-Adsorbents
Source: MDPI journal article supplement (doi:10.3390/en15217971), 2022-10-27
Supplement: s1 [file s1]

Table S1. Coordinates (Longitude-X, Latitude-Y) of each collecting points (green circles) (Longitude-X, Latitude-Y) of municipal household solid waste (MHSW) in the neighborhoods of *Cremação* and *Guamá* in the city of Belém-Pará-Brazil on 18/10/2021, 20/10/2021, 27/10/2021, and 29/10/2021.

| Day        | Collecting points | Coordinates (UTM) |            |
|------------|-------------------|-------------------|------------|
|            |                   | X                 | Y          |
| 18/10/2021 | 1                 | 780950.42         | 9837973.32 |
|            | 2                 | 781119.90         | 9838278.16 |
|            | 3                 | 781009.64         | 9838551.67 |
|            | 4                 | 781568.34         | 9838605.03 |
|            | 5                 | 781463.30         | 9838472.94 |
| 20/10/2021 | 6                 | 781103.21         | 9838585.31 |
|            | 7                 | 781117.53         | 9838342.88 |
|            | 8                 | 780928.98         | 9838507.28 |
|            | 9                 | 781010.98         | 9838551.89 |
|            | 10                | 781242.17         | 9838575.64 |
|            | 11                | 781244.84         | 9838577.52 |
|            | 12                | 781098.10         | 9838591.18 |
| 27/10/2021 | 13                | 780980.57         | 9838439.40 |
|            | 14                | 780946.68         | 9838204.78 |
|            | 15                | 781116.87         | 9838252.38 |
|            | 16                | 781099.50         | 9838652.80 |
| 29/10/2021 | 17                | 781455.46         | 9838305.47 |
|            | 18                | 781800.80         | 9837931.59 |
|            | 19                | 781453.34         | 9838493.90 |
|            | 20                | 781560.25         | 9838606.52 |
|            | 21                | 781652.42         | 9838468.44 |
|            | 22                | 781673.83         | 9838119.49 |
|            | 23                | 780947.53         | 9838102.46 |
|            | 24                | 781115.51         | 9838380.92 |
|            | 26                | 781107.30         | 9838497.16 |
|            | 27                | 781096.49         | 9838642.49 |

Table S2. Classes of compounds, summation of peak areas, CAS number, and retention times of chemical compounds identified by CG-MS in bio-oil by pyrolysis of (organic matter + paper) fraction from MHSW at 400 °C, 1.0 atm, in laboratory scale.

| 400°C                                                                           |          |             |                         |
|---------------------------------------------------------------------------------|----------|-------------|-------------------------|
| Class of Compounds: Chemical Compounds                                          | RT [min] | CAS         | Ⓔ <sub>i</sub> (area.%) |
| <b>Alkanes</b>                                                                  |          |             |                         |
| 7-methylene-Tridecane                                                           | 21.849   | 19780-80-4  | 0.77                    |
| Tridecane                                                                       | 22.082   | 629-50-5    | 1.94                    |
| Tetradecane                                                                     | 24.833   | 629-59-4    | 1.02                    |
| Pentadecane                                                                     | 27.439   | 629-62-9    | 2.16                    |
| Tetradecane                                                                     | 29.945   | 629-59-4    | 0.74                    |
| Σ (Area.%) =                                                                    |          |             | <b>6.64</b>             |
| <b>Alkenes</b>                                                                  |          |             |                         |
| 7-Methylenecycloocta-1,3,5-triene                                               | 12.576   | 2570-13-0   | 0.86%                   |
| trans-4-Nonene                                                                  | 16.807   | 10405-85-3  | 0.88%                   |
| 3-Hexadecene, (Z)-                                                              | 24.641   | 34303-81-6  | 0.87%                   |
| 7-Hexadecene, (Z)-                                                              | 32.014   | 35507-09-06 | 0.85%                   |
| Σ (Area.%) =                                                                    |          |             | <b>3.46</b>             |
| <b>Alkynes</b>                                                                  |          |             |                         |
| 1-Tridecyne                                                                     | 33.512   | 26186-02-07 | 2.01                    |
| Σ (Area.%) =                                                                    |          |             | <b>2,01</b>             |
| <b>Ring-containing Hydrocarbons</b>                                             |          |             |                         |
| Cyclohexane                                                                     | 4.031    | 110-82-7    | 2.25                    |
| Cyclohexadecane                                                                 | 27.252   | 295-65-8    | 0.98                    |
| 1H-3a,7-Methanoazulene, octahydro-1,9,9-trimethyl-4-methylene-, (1α,3α,7α,8αβ)- | 27.993   | 508-55-4    | 1.00                    |
| 1,3-dimetil-Benzene                                                             | 8.770    | 108-38-3    | 1.80                    |
| Bicyclo[4.2.0]octa-1,3,5-triene                                                 | 9.726    | 694-87-1    | 2.03                    |
| Limonene                                                                        | 14.155   | 138-86-3    | 1.34                    |
| 7-Methylbicyclo[4.4.1]undeca-2,4,8-triene                                       | 24.181   | 86067-59-6  | 0.65                    |
| Toluene                                                                         | 6.153    | 108-88-3    | 1.58                    |
| Σ (Area.%) =                                                                    |          |             | <b>11.63</b>            |
| <b>Carboxylic Acids</b>                                                         |          |             |                         |
| 2-(aminooxy)-propanoic acid                                                     | 5.890    | 2786-22-3   | 0.65                    |
| Octanoic acid                                                                   | 17.996   | 0124-07-02  | 1.28                    |
| Dodecanoic acid                                                                 | 28.855   | 0143-07-07  | 4.43                    |
| 9,12-Octadecadienoic acid (Z,Z)-                                                | 38.024   | 60-33-3     | 4.14                    |
| 17-Octadecynoic acid                                                            | 44.633   | 34450-18-5  | 0.63                    |
| Σ (Area.%) =                                                                    |          |             | <b>11.13</b>            |
| <b>Ketones</b>                                                                  |          |             |                         |
| 4-methyl-3-Penten-2-one                                                         | 6.741    | 141-79-7    | 0.66                    |
| 4-amino-4-methyl-2-pentanone                                                    | 8.542    | 0625-04-07  | 4.55                    |
| 3-Methyl-2-Cyclopenten-1-one                                                    | 10.005   | 2758-18-1   | 0.75                    |
| 3-methyl-1,2-Cyclopentanodione                                                  | 13.811   | 765-70-8    | 1.36                    |
| 2,3-dimethyl-2-Cyclopenten-1-one                                                | 14.260   | 1121-05-07  | 0.60                    |
| 4,4-dimethyl-2-Cyclohexen-1-one                                                 | 16.277   | 1073-13-8   | 1.32                    |
| Maltol                                                                          | 16.673   | 118-71-8    | 1.14                    |
| 2,5-Cyclohexadien-1-one, 4-ethyl-3,4-dimethyl-                                  | 18.230   | 17429-35-5  | 1.95                    |
| 2-Piperidinone, N-[4-bromo-n-butyl]-                                            | 32.282   | 195194-80-0 | 0.64                    |
| 3,4,5-trimethyl-2-Ciclopenten-1-one                                             | 15.951   | 55683-21-1  | 1,62                    |
| Σ (Area.%) =                                                                    |          |             | <b>14.59</b>            |
| <b>Alcohols</b>                                                                 |          |             |                         |

|                                                   |        |              |               |
|---------------------------------------------------|--------|--------------|---------------|
| 2-furanmethanol                                   | 8.257  | 98-00-0      | 2.74          |
| Bicyclo[3.3.1]nonan-9-ol                          | 13.089 | 15598-80-8   | 0.76          |
| Carveol                                           | 15.001 | 99-48-9      | 1.20          |
| 2,6-Octadien-1-ol, 2,7-dimethyl-                  | 19.914 | 22410-74-8   | 0.65          |
| 6,6-Dimethyl-2-methylenebicyclo[3.2.0]heptan-3-ol | 29.560 | 1005276-05-0 | 0.62          |
| Isopinocarveol                                    | 32.096 | 6712-79-4    | 0.76          |
| $\Sigma$ (Area.%) =                               |        |              | <b>6.73</b>   |
| <b>Aldehydes</b>                                  |        |              |               |
| E-11-Hexadecenal                                  | 42.214 | ---          | 1.65%         |
| Hexadecanal                                       | 43.036 | 629-80-1     | 0.83%         |
| 13-Octadecenal, (Z)-                              | 44.010 | 58594-45-9   | 0.89%         |
| $\Sigma$ (Area.%) =                               |        |              | <b>3.37</b>   |
| <b>Amines</b>                                     |        |              |               |
| Pyridine                                          | 5.535  | 110-86-1     | 0.68          |
| 4-metil-Pyridine                                  | 7.324  | 108-89-4     | 0.53          |
| R(-)-1-cyano-2-methylpyrrolidine                  | 10.116 | ---          | 0.88          |
| 4-Piperidinone, 2,2,6,6-tetramethyl-              | 18.422 | 826-36-8     | 1.45          |
| Pyrrolidine,1-cyclohexyl-                         | 18.678 | 04-02-7731   | 0.62          |
| 2,6-Octadien-1-amine, 3,7-dimethyl-               | 18.981 | 35278-77-4   | 1.22          |
| $\Sigma$ (Area.%) =                               |        |              | <b>5.38</b>   |
| <b>Phenol</b>                                     |        |              |               |
| Phenol                                            | 12.179 | 108-95-2     | 1.68          |
| 2-Methyl-Phenol                                   | 14.674 | 95-48-7      | 1.06          |
| p-Cresol                                          | 15.304 | 106-44-5     | 2.13          |
| 3-ethyl- Phenol                                   | 17.297 | 620-17-7     | 0.77          |
| 2,5-dimethyl- Phenol,                             | 17.711 | 95-87-4      | 1.77          |
| Creosol                                           | 19.156 | 93-51-6      | 1.24          |
| 6-Methyl-4-indanol                                | 20.281 | 20294-32-0   | 0.60          |
| Phenol, 4-ethyl-2-methoxy-                        | 21.692 | 2785-89-9    | 0.99          |
| Phenol, 2-methoxy-4-(1-propenyl)-                 | 26.530 | 97-54-1      | 0.78          |
| $\Sigma$ (Area.%) =                               |        |              | <b>11.02</b>  |
| <b>Ester</b>                                      |        |              |               |
| Formic acid, 2,6-dimethoxyphenyl ester            | 23.703 | ---          | 111           |
| Ethylene diacrylate                               | 29.764 | 05-11-2274   | 0.72          |
| 6-Bromohexanoic acid, 2,2-dimethylpropyl ester    | 32.894 | 91304-02-08  | 0.83          |
| Hexadecanoic acid, methyl ester                   | 37.033 | 112-39-0     | 1.81          |
| Hexadecanoic acid, ethyl ester                    | 38.886 | 628-97-7     | 0.91          |
| (E,E)- 9,12-Octadecadienoic acid, methyl ester    | 42.518 | 2566-97-4    | 0.78          |
| 13-Octadecenoic acid, methyl ester                | 42.727 | 56554-47-3   | 1.64          |
| Methyl stearate                                   | 43.555 | 112-61-8     | 1.02          |
| Ethyl Oleate                                      | 44.767 | 111-62-6     | 1.01          |
| $\Sigma$ (Area.%) =                               |        |              | <b>9.83</b>   |
| <b>Nitrogenous</b>                                |        |              |               |
| 4,5-di-hidro-2,4,4-trimetil-Oxazol                | 6.374  | 1772-43-6    | 3.07          |
| 2,2,4,5-tetrametil-2H-Imidazol                    | 6.642  | ---          | 0.73          |
| Benzonitrile                                      | 12.687 | 100-47-0     | 0.65          |
| 2-Ethyl-3-Methyl-Pyrazine                         | 12.949 | 15707-23-0   | 0.71          |
| N-(3-Oxobutyl)-2-methylazetidine                  | 15.438 | ---          | 1.58          |
| 4-Piperidinone, 2,2,6,6-tetramethyl-              | 16.906 | 826-36-8     | 2.10          |
| Hydroxylamine, O-decyl-                           | 32.405 | 29812-79-1   | 1.27          |
| Pentadecanenitrile                                | 36.572 | 18300-91-9   | 2.23          |
| $\Sigma$ (Area.%) =                               |        |              | <b>12.34</b>  |
| <b>Amide</b>                                      |        |              |               |
| Hexadecanamide                                    | 45.205 | 629-54-9     | 1.16          |
| $\Sigma$ (Area.%) =                               |        |              | <b>1.16</b>   |
| <b>Non-identified compounds</b>                   |        |              |               |
| <b>Total</b>                                      |        |              | <b>100.00</b> |

Table S3. Classes of compounds, summation of peak areas, CAS number, and retention times of chemical compounds identified by CG-MS in bio-oil by pyrolysis of (organic matter + paper) fraction from MHSW at 450 °C, 1.0 atm, in laboratory scale.

| 450°C                                           |          |             |               |
|-------------------------------------------------|----------|-------------|---------------|
| Class of Compounds: Chemical Compounds          | RT [min] | CAS         | Ⓐi (area.%)   |
| <b>Alkanes</b>                                  |          |             |               |
| Tridecane                                       | 22.082   | 629-50-5    | 1.621         |
| Tetradecane                                     | 24.833   | 629-59-4    | 1.605         |
| Pentadecane                                     | 27.439   | 629-62-9    | 2.995         |
| Tetradecane                                     | 29.945   | 629-59-4    | 1.356         |
| Nonadecane                                      | 32.399   | 629-92-5    | 2.409         |
| 2,6-Dimethyldecane                              | 12.896   | 13150-81-7  | 0.755         |
| Dodecane                                        | 16.090   | 112-40-3    | 1.031         |
| Dodecane                                        | 19.168   | 112-40-3    | 1.749         |
| $\Sigma$ (Area.%) =                             |          |             | <b>13.521</b> |
| <b>Alkenes</b>                                  |          |             |               |
| 4-Tridecene, (Z)-                               | 18.923   | 41446-54-2  | 1.348         |
| 4-Tetradecene, (Z)-                             | 24.641   | 41446-65-5  | 1.805         |
| 1-Tridecene                                     | 32.282   | 2437-56-1   | 0.997         |
| 1,E-11,Z-13-Octadecatriene                      | 44.627   | 80625-36-1  | 1.253         |
| 1-Dodecene                                      | 15.811   | 112-41-4    | 0.886         |
| $\Sigma$ (Area.%) =                             |          |             | <b>6.289</b>  |
| <b>Alkynes</b>                                  |          |             |               |
| 4-Tridecyne                                     | 16.265   | 60186-79-0  | 1.043         |
| $\Sigma$ (Area.%) =                             |          |             | <b>1.043</b>  |
| <b>Ring-containing Hydrocarbons</b>             |          |             |               |
| Cyclohexane                                     | 4.031    | 110-82-7    | 2.903         |
| Toluene                                         | 6.153    | 108-88-3    | 1.642         |
| Benzene, 1,3-dimethyl-                          | 8.770    | 108-38-3    | 2.240         |
| Bicyclo[4.2.0]octa-1,3,5-triene                 | 9.720    | 694-87-1    | 2.961         |
| D-Limonene                                      | 14.161   | 5989-27-5   | 2.373         |
| Cyclododecane                                   | 21.855   | 294-62-2    | 1.246         |
| 1-Cyclohexylnonene                              | 33.518   | 114614-84-5 | 2.217         |
| 1-Cyclohexylnonene                              | 33.518   | 114614-84-5 | 1.108         |
| $\Sigma$ (Area.%) =                             |          |             | <b>16.690</b> |
| <b>Carboxylic Acids</b>                         |          |             |               |
| Dodecanoic acid                                 | 28.855   | 0143-07-07  | 2.191         |
| 9,12-Octadecadienoic acid (Z,Z)-                | 37.994   | 60-33-3     | 6.804         |
| $\Sigma$ (Area.%) =                             |          |             | <b>8.995</b>  |
| <b>Ketones</b>                                  |          |             |               |
| 2-Pentanone, 4-amino-4-methyl-                  | 8.560    | 0625-04-07  | 0.856         |
| Ethanone, 1-(2-furanyl)-                        | 10.110   | 1192-62-7   | 0.750         |
| 1,2-Cyclopentanedione, 3-methyl-                | 13.811   | 765-70-8    | 1.100         |
| 2,3-dimethyl-2-Cyclopenten-1-one, 2,3-dimethyl- | 14.272   | 1121-05-07  | 0.753         |
| 2-Cyclopenten-1-one, 3-ethyl-2-hydroxy-         | 16.796   | 21835-01-08 | 0.807         |
| Cyclopentadecanone, 4-methyl-                   | 42.931   | 34894-60-5  | 0.793         |
| $\Sigma$ (Area.%) =                             |          |             | <b>5.059</b>  |
| <b>Alcohols</b>                                 |          |             |               |
| 2-furanmethanol                                 | 8.257    | 98-00-0     | 1.872         |
| 3-Thujen-2-ol, stereoisomer                     | 15.000   | 3310-03-0   | 1.182         |
| 1-Octanol, 2-butyl-                             | 29.759   | 08-02-3913  | 1.217         |
| $\Sigma$ (Area.%) =                             |          |             | <b>4.271</b>  |
| <b>Phenol</b>                                   |          |             |               |
| Phenol                                          | 12.174   | 108-95-2    | 1.907         |
| 2-Methyl-Phenol                                 | 14.657   | 95-48-7     | 1.318         |
| p-Cresol                                        | 15.309   | 106-44-5    | 4.568         |

|                                          |        |             |               |
|------------------------------------------|--------|-------------|---------------|
| Phenol, 2-methoxy-                       | 15.933 | 90-05-1     | 1.126         |
| Phenol, 2-ethyl-                         | 17.291 | 90-00-6     | 0.947         |
| Phenol, 3,4-dimethyl-                    | 17.699 | 95-65-8     | 1.772         |
| Phenol, 3-ethyl-                         | 18.218 | 620-17-7    | 2.091         |
| Phenol, 4-ethyl-2-methoxy-               | 21.703 | 2785-89-9   | 1.044         |
| Phenol, 2,6-dimethoxy-                   | 23.697 | 91-10-1     | 1.062         |
| Phenol, 3-phenoxy-                       | 33.273 | 713-68-8    | 0.752         |
| $\Sigma$ (Area.%) =                      |        |             | <b>16.587</b> |
| <b>Ester</b>                             |        |             |               |
| Oxalic acid, allyl nonyl ester           | 34.235 | ---         | 0.751         |
| Hexadecanoic acid, methyl ester          | 37.027 | 112-39-0    | 1.902         |
| Eicosanoic acid, ethyl ester             | 38.869 | 18281-05-05 | 1.192         |
| 9-Octadecenoic acid (Z)-, methyl ester   | 42.739 | 112-62-9    | 1.899         |
| Methyl stearate                          | 43.555 | 112-61-8    | 1.002         |
| 9-Octadecenoic acid, ethyl ester         | 44.756 | 6512-99-8   | 1.160         |
| $\Sigma$ (Area.%) =                      |        |             | <b>7.906</b>  |
| <b>Nitrogenous</b>                       |        |             |               |
| Azetidine, 3-methyl-3-phenyl-            | 12.593 | 5961-33-1   | 1.461         |
| Tridecanenitrile                         | 27.264 | 629-60-7    | 1.401         |
| Hexadecanenitrile                        | 36.572 | 629-79-8    | 4.149         |
| Oleanitrile                              | 42.203 | ---         | 2.325         |
| Nonadecanenitrile                        | 43.048 | 28623-46-3  | 1.887         |
| $\Sigma$ (Area.%) =                      |        |             | <b>11.223</b> |
| <b>Amide</b>                             |        |             |               |
| 2-Methyl-6-propylpiperidine              | 18.434 | 68170-79-6  | 1.135         |
| 13-Docosenamide, (Z)-                    | 45.204 | 112-84-5    | 1.959         |
| $\Sigma$ (Area.%) =                      |        |             | <b>3.094</b>  |
| <b>Chlorinated</b>                       |        |             |               |
| 1,10-Dichlorodecane                      | 32.102 | 2162-98-3   | 2.487         |
| 3-Chloropropionic acid, pentadecyl ester | 38.309 | ---         | 1.855         |
| $\Sigma$ (Area.%) =                      |        |             | <b>4.342</b>  |
| <b>Total</b>                             |        |             | <b>100.00</b> |

Table S4. Classes of compounds, summation of peak areas, CAS number, and retention times of chemical compounds identified by CG-MS in bio-oil by pyrolysis of (organic matter + paper) fraction from MHSW at 475 °C, 1.0 atm, in laboratory scale.

| 475°C                                    |          |             |                         |
|------------------------------------------|----------|-------------|-------------------------|
| Class of Compounds: Chemical Compounds   | RT [min] | CAS         | Ⓐ <sub>i</sub> (area.%) |
| <b>Alkanes</b>                           |          |             |                         |
| Decane                                   | 24.839   | 124-18-5    | 0.902                   |
| Tetradecane                              | 27.433   | 629-59-4    | 2.421                   |
| Σ (Area.%) =                             |          |             | <b>3.323</b>            |
| <b>Alkenes</b>                           |          |             |                         |
| Benzene, (1-methylethyl)-                | 10.717   | 98-82-8     | 0.459                   |
| 1-Undecene, 4-methyl-                    | 22.082   | 74630-39-0  | 1.233                   |
| Σ (Area.%) =                             |          |             | <b>1.692</b>            |
| <b>Alkynes</b>                           |          |             |                         |
| 1-Octadecyne                             | 42.046   | 629-89-0    | 1.138                   |
| Σ (Area.%) =                             |          |             | <b>1.138</b>            |
| <b>Ring-containing Hydrocarbons</b>      |          |             |                         |
| Cyclohexane                              | 4.025    | 110-82-7    | 3.126                   |
| Toluene                                  | 6.153    | 108-88-3    | 1.771                   |
| Benzene, 1,3-dimethyl-                   | 8.770    | 108-38-3    | 2.239                   |
| Bicyclo[4.2.0]octa-1,3,5-triene          | 9.726    | 694-87-1    | 3.055                   |
| Cyclohexene, 4-ethenyl-1,4-dimethyl-     | 14.155   | 1743-61-9   | 1.498                   |
| 1-Cyclohexylnonene                       | 33.501   | 114614-84-5 | 2.737                   |
| Σ (Area.%) =                             |          |             | <b>14.426</b>           |
| <b>Carboxylic Acids</b>                  |          |             |                         |
| Dodecanoic acid                          | 28.855   | 0143-07-07  | 3.677                   |
| Oleic Acid                               | 38.000   | 112-80-1    | 9.912                   |
| Σ (Area.%) =                             |          |             | <b>13.589</b>           |
| <b>Ketones</b>                           |          |             |                         |
| 3-Penten-2-one, 4-methyl-                | 6.736    | 141-79-7    | 0.993                   |
| 2-Pentanone, 4-amino-4-methyl-           | 8.548    | 0625-04-07  | 4.874                   |
| 2-Cyclopenten-1-one, 2-methyl-           | 10.005   | 1120-73-6   | 0.550                   |
| 4,4-Dimethyl-2-cyclopenten-1-one         | 10.116   | 22748-16-9  | 0.736                   |
| 3-Methylcyclopentane-1,2-dione           | 13.806   | ---         | 1.217                   |
| 2-Nonadecanone                           | 42.908   | 629-66-3    | 1.274                   |
| Σ (Area.%) =                             |          |             | <b>9.644</b>            |
| <b>Alcohols</b>                          |          |             |                         |
| 2-Furanmethanol                          | 8.257    | 98-00-0     | 2.537                   |
| Cyclopentanol, 1-(methylenecyclopropyl)- | 14.995   | 86951-58-8  | 1.348                   |
| 1-Decanol                                | 24.641   | 112-30-1    | 0.997                   |
| 2-Hexyl-1-octanol                        | 32.411   | 19780-79-1  | 1.612                   |
| Σ (Area.%) =                             |          |             | <b>6.494</b>            |
| <b>Phenol</b>                            |          |             |                         |
| Phenol                                   | 12.185   | 108-95-2    | 1.429                   |
| Phenol, 2-methyl-                        | 14.663   | 95-48-7     | 0.924                   |
| p-Cresol                                 | 15.310   | 106-44-5    | 1.590                   |
| Phenol, 2-methoxy-                       | 15.939   | 90-05-1     | 1.587                   |
| Phenol, 3,5-dimethyl-                    | 17.705   | 108-68-9    | 1.093                   |
| Phenol, 2-ethyl-                         | 18.218   | 90-00-6     | 1.491                   |
| Phenol, 4-ethyl-2-methoxy-               | 21.692   | 2785-89-9   | 0.967                   |
| Phenol, 2-methoxy-4-(1-propenyl)-        | 26.536   | 97-54-1     | 0.997                   |
| Σ (Area.%) =                             |          |             | <b>10.078</b>           |
| <b>Ester</b>                             |          |             |                         |
| Hexadecanoic acid, methyl ester          | 37.027   | 112-39-0    | 2.975                   |
| Hexadecanoic acid, ethyl ester           | 38.869   | 628-97-7    | 1.027                   |
| Methyl stearate                          | 43.543   | 112-61-8    | 1.616                   |
| 8-Octadecenoic acid, methyl ester        | 42.727   | 2345-29-1   | 2.141                   |
| Σ (Area.%) =                             |          |             | <b>7.759</b>            |
| <b>Nitrogenous</b>                       |          |             |                         |

|                                                              |        |            |               |
|--------------------------------------------------------------|--------|------------|---------------|
| Oxazole, 4,5-dihydro-2,4,4-trimethyl-                        | 6.380  | 1772-43-6  | 0.445         |
| Azetidine, 3-methyl-3-phenyl-                                | 12.576 | 5961-33-1  | 1.324         |
| Benzonitrile                                                 | 12.687 | 100-47-0   | 0.823         |
| 1,2,3-Trimethylpiperidin-4-one                               | 15.432 | ---        | 2.829         |
| 2,4-Dimethoxy-5-methyl pyrimidine                            | 23.691 | 5151-34-8  | 1.074         |
| 1,2,4,4,6-Pentamethyl-1,4-dihydropyridine-3,5-dicarbonitrile | 33.262 | 32136-89-3 | 0.862         |
| Hexadecanenitrile                                            | 36.567 | 629-79-8   | 5.269         |
| Oleanitrile                                                  | 42.209 | ---        | 3.562         |
| Eicosanenitrile                                              | 43.048 | 4616-73-3  | 1.797         |
| $\Sigma$ (Area.%) =                                          |        |            | <b>17.985</b> |
| <b>Amide</b>                                                 |        |            |               |
| 2-(2-Isopropenyl-5-methyl-cyclopentyl)-acetamide             | 19.162 | ---        | 1.072         |
| Nonadecanamide                                               | 45.199 | 58185-32-3 | 3.515         |
| $\Sigma$ (Area.%) =                                          |        |            | <b>4.587</b>  |
| <b>Amine</b>                                                 |        |            |               |
| Piperidin-4-one, 1-ethyl-2,3-dimethyl-                       | 18.428 | ---        | 1.529         |
| 4-Piperidinone, 2,2,6,6-tetramethyl-                         | 16.907 | 826-36-8   | 4.683         |
| $\Sigma$ (Area.%) =                                          |        |            | <b>6.212</b>  |
| <b>Chlorinated</b>                                           |        |            |               |
| 1,10-Dichlorodecane                                          | 32.114 | 2162-98-3  | 2.438         |
| $\Sigma$ (Area.%) =                                          |        |            | <b>2.438</b>  |
| <b>Non-identified compounds</b>                              |        |            | <b>0.637</b>  |
| <b>Total</b>                                                 |        |            | <b>100.00</b> |

Table S5. Classes of compounds, summation of peak areas, CAS number, and retention times of chemical compounds identified by CG-MS in bio-oil by thermal catalytic cracking of (organic matter + paper) fraction from MHSW at 475 °C, 1.0 atm, 5.0% (wt.) of Ca(OH)<sub>2</sub>, in laboratory scale.

| 5% Ca(OH) <sub>2</sub> ; 475°C         |          |             |                         |
|----------------------------------------|----------|-------------|-------------------------|
| Class of Compounds: Chemical Compounds | RT [min] | CAS         | ⊗ <sub>i</sub> (area.%) |
| <b>Alkanes</b>                         |          |             |                         |
| Octane, 3,5-dimethyl-                  | 19.162   | 15869-93-9  | 1.026                   |
| Tridecane                              | 22.077   | 629-50-5    | 1.62                    |
| Tetradecane                            | 24.834   | 629-59-4    | 1.40                    |
| Pentadecane                            | 27.439   | 629-62-9    | 2.84                    |
| Hexadecane                             | 29.939   | 544-76-3    | 1.33                    |
| Heptadecane                            | 32.405   | 629-78-7    | 2.78                    |
| Σ (Area.%) =                           |          |             | <b>11.23</b>            |
| <b>Alkenes</b>                         |          |             |                         |
| 2-Pentene, 2,4-dimethyl-               | 6.736    | 625-65-0    | 2.00                    |
| 1-Octene, 3,7-dimethyl-                | 12.174   | 04-01-4984  | 1.82                    |
| 1-Tetradecene                          | 24.635   | 1120-36-1   | 1.72                    |
| Z,Z,Z-1,4,6,9-Nonadecatetraene         | 32.102   | ---         | 1.81                    |
| Σ (Area.%) =                           |          |             | <b>7.35</b>             |
| <b>Ring-containing Hydrocarbons</b>    |          |             |                         |
| Cyclohexane                            | 4.031    | 110-82-7    | 2.31                    |
| Toluene                                | 6.153    | 108-88-3    | 1.45                    |
| Ethylbenzene                           | 8.537    | 100-41-4    | 8.06                    |
| 1,3,5,7-Cyclooctatetraene              | 8.77     | 629-20-9    | 1.69                    |
| Cyclododecane                          | 21.849   | 294-62-2    | 1.48                    |
| Σ (Area.%) =                           |          |             | <b>14.99</b>            |
| <b>Ketones</b>                         |          |             |                         |
| 2-Cyclopenten-1-one, 3,4,4-trimethyl-  | 15.315   | 30434-65-2  | 2.52                    |
| 2-Cyclopenten-1-one, 3,4,4-trimethyl-  | 15.945   | 30434-65-2  | 1.18                    |
| 2-Heptadecanone                        | 36.537   | 2922-51-2   | 11.68                   |
| 2-Nonadecanone                         | 42.908   | 629-66-3    | 4.50                    |
| Σ (Area.%) =                           |          |             | <b>19.88</b>            |
| <b>Alcohols</b>                        |          |             |                         |
| 2-Furanmethanol                        | 8.053    | 98-00-0     | 1.32                    |
| 2-Methyl-Z,Z-3,13-octadecadienol       | 42.215   | ---         | 5.28                    |
| Σ (Area.%) =                           |          |             | <b>6.60</b>             |
| <b>Phenol</b>                          |          |             |                         |
| Phenol                                 | 9.726    | 108-95-2    | 2.16                    |
| Phenol, 3-methyl-                      | 13.042   | 108-39-4    | 2.90                    |
| Phenol, 2,5-dimethyl-                  | 17.699   | 95-87-4     | 1.93                    |
| Phenol, 3-ethyl-                       | 18.218   | 620-17-7    | 1.53                    |
| Σ (Area.%) =                           |          |             | <b>8.52</b>             |
| <b>Ester</b>                           |          |             |                         |
| Hexadecanoic acid, methyl ester        | 37.021   | 112-39-0    | 1.34                    |
| 9-Octadecene, 1-methoxy-, (E)-         | 42.016   | 56847-01-09 | 2.65                    |
| 10-Octadecenoic acid, methyl ester     | 42.727   | 13481-95-3  | 1.17                    |
| Σ (Area.%) =                           |          |             | <b>5.16</b>             |
| <b>Nitrogenous</b>                     |          |             |                         |
| Piperidine, 1-methyl-                  | 7.913    | 626-67-5    | 3.71                    |
| Piperidine, 1,2-dimethyl-              | 12.611   | 671-36-3    | 1.26                    |
| 4-Piperidinone, 2,2,6,6-tetramethyl-   | 16.907   | 826-36-8    | 6.27                    |
| Octadecanenitrile                      | 43.054   | 638-65-3    | 3.12                    |
| Σ (Area.%) =                           |          |             | <b>14.36</b>            |
| <b>Amide</b>                           |          |             |                         |
| Acetamide, N-(aminocarbonyl)-          | 5.541    | 0591-07-01  | 1.28                    |
| Nonadecanamide                         | 45.205   | 58185-32-3  | 1.66                    |
| cis-11-Eicosenamide                    | 48.725   | 10436-08-05 | 1.40                    |
| Σ (Area.%) =                           |          |             | <b>4.34</b>             |
| <b>Amine</b>                           |          |             |                         |



|                                     |        |            |               |
|-------------------------------------|--------|------------|---------------|
| 2-Pentanone, 4-amino-4-methyl-      | 8.257  | 0625-04-07 | 2.31          |
| $\Sigma$ (Area.%) =                 |        |            | <b>2.31</b>   |
| <b>Aldehyde</b>                     |        |            |               |
| 10-Undecen-1-al, 2-methyl-          | 18.923 |            | 1.22          |
| cis-7-Decen-1-al                    | 19.908 | 21661-97-2 | 1.23          |
| 2-Isopropylidene-5-methylhex-4-enal | 21.692 | 3304-28-7  | 1.45          |
| (E)-Tetradec-2-enal                 | 27.258 | 51534-36-2 | 1.38          |
| $\Sigma$ (Area.%) =                 |        |            | <b>5.28</b>   |
| <b>Total</b>                        |        |            | <b>100.00</b> |

Table S6. Classes of compounds, summation of peak areas, CAS number, and retention times of chemical compounds identified by CG-MS in bio-oil by thermal catalytic cracking of (organic matter + paper) fraction from MHSW at 475 °C, 1.0 atm, 10.0% (wt.) of Ca(OH)<sub>2</sub>, in laboratory scale.

| 10% Ca(OH) <sub>2</sub> ; 475°C        |          |             |                         |
|----------------------------------------|----------|-------------|-------------------------|
| Class of Compounds: Chemical Compounds | RT [min] | CAS         | Ⓢ <sub>i</sub> (area.%) |
| <b>Alkanes</b>                         |          |             |                         |
| 2,6-Dimethyldecane                     | 19.162   | 13150-81-7  | 1.761                   |
| Tridecane                              | 22.076   | 629-50-5    | 1.729                   |
| Tetradecane                            | 24.833   | 629-59-4    | 1.825                   |
| Pentadecane                            | 27.439   | 629-62-9    | 3.654                   |
| Hexadecane                             | 29.939   | 544-76-3    | 1.672                   |
| Tetradecane, 2,6,10-trimethyl-         | 32.411   | 14905-56-7  | 4.300                   |
| Octane, 4-ethyl-                       | 16.085   | 15869-86-0  | 3.721                   |
| Σ (Area.%) =                           |          |             | <b>18.662</b>           |
| <b>Alkenes</b>                         |          |             |                         |
| 1-Decene                               | 12.611   | 0872-05-09  | 2.478                   |
| 2-Dodecene, (E)-                       | 18.923   | 7206-13-5   | 1.894                   |
| 1-Tetradecene                          | 24.629   | 1120-36-1   | 2.577                   |
| Σ (Area.%) =                           |          |             | <b>6.949</b>            |
| <b>Ring-containing Hydrocarbons</b>    |          |             |                         |
| Cyclohexane                            | 4.031    | 110-82-7    | 2.279                   |
| Toluene                                | 6.153    | 108-88-3    | 1.822                   |
| Ethylbenzene                           | 8.770    | 100-41-4    | 1.897                   |
| Styrene                                | 9.720    | 100-42-5    | 2.705                   |
| Limonene                               | 14.161   | 138-86-3    | 1.049                   |
| Cyclododecane                          | 21.855   | 294-62-2    | 1.720                   |
| Σ (Area.%) =                           |          |             | <b>11.472</b>           |
| <b>Ketones</b>                         |          |             |                         |
| 2-Cyclopenten-1-one, 2,3-dimethyl-     | 14.266   | 1121-05-07  | 0.814                   |
| 2-Heptadecanone                        | 36.531   | 2922-51-2   | 15.176                  |
| 2-Nonadecanone                         | 42.914   | 629-66-3    | 6.442                   |
| Σ (Area.%) =                           |          |             | <b>22.432</b>           |
| <b>Alcohols</b>                        |          |             |                         |
| 2-Furanmethanol                        | 8.251    | 98-00-0     | 2.152                   |
| 1-Hexadecanol, 2-methyl-               | 32.277   | 2490-48-4   | 1.685                   |
| 2-Methyl-Z,Z-3,13-octadecadienol       | 42.197   | ---         | 6.723                   |
| 1-Tetradecanol                         | 29.759   | 112-72-1    | 2.039                   |
| Σ (Area.%) =                           |          |             | <b>12.599</b>           |
| <b>Phenol</b>                          |          |             |                         |
| Phenol                                 | 12.179   | 108-95-2    | 2.200                   |
| Phenol, 2-methyl-                      | 14.662   | 95-48-7     | 1.242                   |
| p-Cresol                               | 15.304   | 106-44-5    | 2.457                   |
| Phenol, 2,5-dimethyl-                  | 17.693   | 95-87-4     | 3.375                   |
| Phenol, 2-ethyl-                       | 18.218   | 90-00-6     | 2.334                   |
| Σ (Area.%) =                           |          |             | <b>11.608</b>           |
| <b>Ether</b>                           |          |             |                         |
| Caryophyllene oxide                    | 32.096   | 1139-30-6   | 2.334                   |
| 9-Octadecene, 1,1-dimethoxy-, (Z)-     | 42.016   | 15677-71-1  | 3.407                   |
| Σ (Area.%) =                           |          |             | <b>5.741</b>            |
| <b>Nitrogenous</b>                     |          |             |                         |
| Indolizine                             | 22.438   | 274-40-8    | 1.633                   |
| Eicosanenitrile                        | 43.048   | 4616-73-3   | 3.195                   |
| Σ (Area.%) =                           |          |             | <b>4.828</b>            |
| <b>Amide</b>                           |          |             |                         |
| cis-9,10-Epoxyoctadecanamide           | 45.199   | 172995-07-2 | 2.269                   |
| Σ (Area.%) =                           |          |             | <b>2.269</b>            |
| <b>Aldehyde</b>                        |          |             |                         |

|                                   |        |            |               |
|-----------------------------------|--------|------------|---------------|
| (E)-Tetradec-2-enal               | 27.252 | 51534-36-2 | 1.970         |
| $\Sigma$ (Area.%) =               |        |            | <b>1.970</b>  |
| <b>Oxygenated</b>                 |        |            |               |
| 2-Oxatricyclo[4.3.1.0(3,8)]decane | 13.036 | 16710-57-9 | 1.469         |
| $\Sigma$ (Area.%) =               |        |            | <b>1.469</b>  |
| <b>Non-identified compounds</b>   |        |            | <b>0.001</b>  |
| <b>Total</b>                      |        |            | <b>100.00</b> |

Table S7. Classes of compounds, summation of peak areas, CAS number, and retention times of chemical compounds identified by CG-MS in bio-oil by thermal catalytic cracking of (organic matter + paper) fraction from MHSW at 475 °C, 1.0 atm, 15.0% (wt.) of Ca(OH)<sub>2</sub>, in laboratory scale.

| 15% Ca(OH) <sub>2</sub> ; 475°C        |          |             |               |
|----------------------------------------|----------|-------------|---------------|
| Class of Compounds: Chemical Compounds | RT [min] | CAS         | Ⓐ (area.%)    |
| <b>Alkanes</b>                         |          |             |               |
| 1-Decene                               | 12.617   | 0872-05-09  | 2.267         |
| Decane                                 | 12.891   | 124-18-5    | 1.070         |
| Undecane                               | 16.085   | 1120-21-4   | 1.367         |
| Dodecane                               | 19.156   | 112-40-3    | 1.781         |
| Tridecane                              | 22.082   | 629-50-5    | 1.937         |
| Tetradecane                            | 24.839   | 629-59-4    | 1.824         |
| Pentadecane                            | 27.439   | 629-62-9    | 3.632         |
| Hexadecane                             | 29.939   | 544-76-3    | 1.725         |
| Heptadecane                            | 32.405   | 629-78-7    | 3.891         |
| Tetradecane, 2,6,10-trimethyl-         | 34.229   | 14905-56-7  | 1.863         |
| Σ (Area.%) =                           |          |             | <b>20.287</b> |
| <b>Alkenes</b>                         |          |             |               |
| 1-Nonene                               | 9.440    | 0124-11-8   | 0.565         |
| Styrene                                | 9.720    | 100-42-5    | 2.630         |
| 1-Undecene                             | 15.817   | 821-95-4    | 1.630         |
| 3-Dodecene, (E)-                       | 18.923   | 7239-23-8   | 2.075         |
| 6-Tridecene, (Z)-                      | 21.861   | 6508-77-6   | 2.005         |
| 7-Tetradecene                          | 24.635   | 10374-74-0  | 2.700         |
| 3-Hexadecene, (Z)-                     | 29.753   | 34303-81-6  | 1.804         |
| 8-Heptadecene                          | 32.282   | 06-04-2579  | 1.659         |
| Σ (Area.%) =                           |          |             | <b>12.438</b> |
| <b>Ring-containing Hydrocarbons</b>    |          |             |               |
| Cyclohexane                            | 4.025    | 110-82-7    | 2.921         |
| Toluene                                | 6.153    | 108-88-3    | 1.985         |
| Ethylbenzene                           | 8.764    | 100-41-4    | 2.089         |
| D-Limonene                             | 14.161   | 5989-27-5   | 0.968         |
| Cyclopentadecane                       | 27.252   | 295-48-7    | 2.043         |
| Σ (Area.%) =                           |          |             | <b>10.006</b> |
| <b>Ketones</b>                         |          |             |               |
| 2-Cyclopenten-1-one, 2,3-dimethyl-     | 14.272   | 1121-05-07  | 0.771         |
| 2-Heptadecanone                        | 36.532   | 2922-51-2   | 13.925        |
| 3-Octadecanone                         | 39.137   | 18261-92-2  | 1.482         |
| 2-Nonadecanone                         | 42.902   | 629-66-3    | 6.517         |
| Σ (Area.%) =                           |          |             | <b>22.695</b> |
| <b>Alcohols</b>                        |          |             |               |
| 2-Furanmethanol                        | 8.257    | 98-00-0     | 1.888         |
| p-Mentha-1(7),8-dien-2-ol              | 15.001   | 35907-10-9  | 0.626         |
| 2-Methyl-Z,Z-3,13-octadecadienol       | 42.197   | -           | 6.178         |
| Σ (Area.%) =                           |          |             | <b>8.692</b>  |
| <b>Phenol</b>                          |          |             |               |
| Phenol                                 | 12.174   | 108-95-2    | 1.678         |
| Phenol, 2-methyl-                      | 14.662   | 95-48-7     | 1.195         |
| p-Cresol                               | 15.304   | 106-44-5    | 2.336         |
| Phenol, 2,5-dimethyl-                  | 17.705   | 95-87-4     | 1.883         |
| Phenol, 2-ethyl-                       | 18.212   | 90-00-6     | 2.042         |
| Σ (Area.%) =                           |          |             | <b>9.134</b>  |
| <b>Ester</b>                           |          |             |               |
| Hexadecanoic acid, methyl ester        | 37.027   | 112-39-0    | 0.978         |
| Σ (Area.%) =                           |          |             | <b>0.978</b>  |
| <b>Ether</b>                           |          |             |               |
| 9-Octadecene, 1-methoxy-, (E)-         | 42.016   | 56847-01-09 | 3.109         |

|                                                                             |        |           |               |
|-----------------------------------------------------------------------------|--------|-----------|---------------|
| $\Sigma$ (Area.%) =                                                         |        |           | <b>3.109</b>  |
| <b>Nitrogenous</b>                                                          |        |           |               |
| Benzenepropanoic acid, $\alpha$ -(hydroxyimino)-                            | 22.432 | 3682-17-5 | 1.415         |
| Octadecanenitrile                                                           | 43.042 | 638-65-3  | 2.318         |
| $\Sigma$ (Area.%) =                                                         |        |           | <b>3.733</b>  |
| <b>Amide</b>                                                                |        |           |               |
| 9-Octadecenamide, (Z)-                                                      | 45.199 | 301-02-0  | 1.891         |
| 9-Octadecenamide, (Z)-                                                      | 48.713 | 301-02-0  | 1.627         |
| $\Sigma$ (Area.%) =                                                         |        |           | <b>3.518</b>  |
| <b>Aldehyde</b>                                                             |        |           |               |
| 2-((2R,4aR,8aS)-4a-Methyl-8-methylenedecahydronaphthalen-2-yl)acrylaldehyde | 32.113 | 3650-40-6 | 1.711         |
| $\Sigma$ (Area.%) =                                                         |        |           | <b>1.711</b>  |
| <b>Non-identified compounds</b>                                             |        |           | <b>3.699</b>  |
| <b>Total</b>                                                                |        |           | <b>100.00</b> |
